# Supplementary material for: Highly selective adsorption of uranium in strong HNO3 media achieved on a phosphonic acid functionalized nanoporous polymer
Source: Royal Society of Chemistry journal article supplement (doi:10.1039/c7ta07320h), 2017-01-01
Supplement: c7ta07320h1.pdf [file c7ta07320h1.pdf]

## Electronic Supporting Information

Highly selective adsorption for uranium in strong HNO<sub>3</sub> media  
achieved on phosphonic acid functionalized nanoporous polymer

Dingzhong Yuan<sup>\*a,b</sup>, Yun Wang<sup>b</sup>, Yong Qian<sup>b</sup>, Yan Liu<sup>b</sup>, Gang Feng<sup>\*c</sup>, Bin Huang<sup>b</sup> and  
Xiaohong Zhao<sup>\*c</sup>

<sup>a</sup> Key Laboratory of Applied Chemistry of Zhejiang Province, Zhejiang University, Hangzhou 310028, China, E-mail: ydz3214@126.com.

<sup>b</sup> Jiangxi Province Key Laboratory of Polymer Micro/Nano Manufacturing and Devices, East China University of Technology, Nanchang, 330013, China.

<sup>c</sup> College of Chemistry, Nanchang University, Nanchang 330031, China, E-mail: zhaoxh@ncu.edu.cn; fenggang@ncu.edu.cn.

### **Synthesis of carboxyl functionalized nanoporous polymer adsorbent P1**

Nanoporous polymer adsorbent P1 was prepared according to the following steps. In a typical synthesis, 1.5 g ethyleneglycol dimethacrylate (EGDMA) and 1.5 g acrylic acid (AA) were dissolved in 5 mL ethyl acetate, and then 0.05 azobisisobutyronitrile (AIBN) was added. After stirring for 4 h at room temperature, the solution was put in an autoclave with 25 mL of Teflon liner and then treated at 100 °C for 24 h. The system was cooled to room temperature and a solid monolith P1 was obtained after the slow evaporation of ethyl acetate.

### **Synthesis of amide functionalized nanoporous polymer adsorbent P2**

Nanoporous polymer adsorbent P2 was prepared according to the following steps. In a typical synthesis, 1.5 g ethyleneglycol dimethacrylate (EGDMA) and 1.5 g acrylamide (AM) were dissolved in 5 mL ethyl acetate, and then 0.05 azobisisobutyronitrile (AIBN) was added. After stirring for 4 h at room temperature, the solution was put in an autoclave with 25 mL of Teflon liner and then treated at 100 °C for 24 h. The system was cooled to room temperature and a solid monolith P2 was obtained after the slow evaporation of ethyl acetate.

### **Synthesis of hydroxyl functionalized nanoporous polymer adsorbent P3**

Nanoporous polymer adsorbent P3 was prepared according to the following steps. In a typical synthesis, 1.5 g ethyleneglycol dimethacrylate (EGDMA) and 1.5 g Hydroxyethyl methacrylate (HEMA) were dissolved in 5 mL ethyl acetate, and then 0.05 azobisisobutyronitrile (AIBN) was added. After stirring for 4 h at room temperature, the solution was put in an autoclave with

25 mL of Teflon liner and then treated at 100 °C for 24 h. The system was cooled to room temperature and a solid monolith P3 was obtained after the slow evaporation of ethyl acetate.

#### **Synthesis of phosphonic acid functionalized nanoporous polymer adsorbent P4**

Nanoporous polymer adsorbent P4 was prepared according to the following steps. In a typical synthesis, 2.0 g ethyleneglycol dimethacrylate (EGDMA) and 1.0 g vinylphosphate (VPA) were dissolved in 5 mL ethyl acetate, and then 0.05 azobisisobutyronitrile (AIBN) was added. After stirring for 4 h at room temperature, the solution was put in an autoclave with 25 mL of Teflon liner and then treated at 100 °C for 24 h. The system was cooled to room temperature and a solid monolith P2 was obtained after the slow evaporation of ethyl acetate.

#### **Synthesis of phosphonic acid functionalized nanoporous polymer adsorbent P5**

Nanoporous polymer adsorbent P5 was prepared according to the following steps. In a typical synthesis, 1.0 g ethyleneglycol dimethacrylate (EGDMA) and 2.0 g vinylphosphate (VPA) were dissolved in 5 mL ethyl acetate, and then 0.05 azobisisobutyronitrile (AIBN) was added. After stirring for 4 h at room temperature, the solution was put in an autoclave with 25 mL of Teflon liner and then treated at 100 °C for 24 h. The system was cooled to room temperature and a solid monolith P4 was obtained after the slow evaporation of ethyl acetate.

#### **Selectivity experiments for P1, P2, P3, P4 and P5**

When studying selective adsorption of polymer adsorbent P1, P2, P3, P4 and P5, the concentrations of U(VI) and other metal ions in supernatants were determined by inductively coupled plasma atomic emission spectroscopy (ICP-AES).

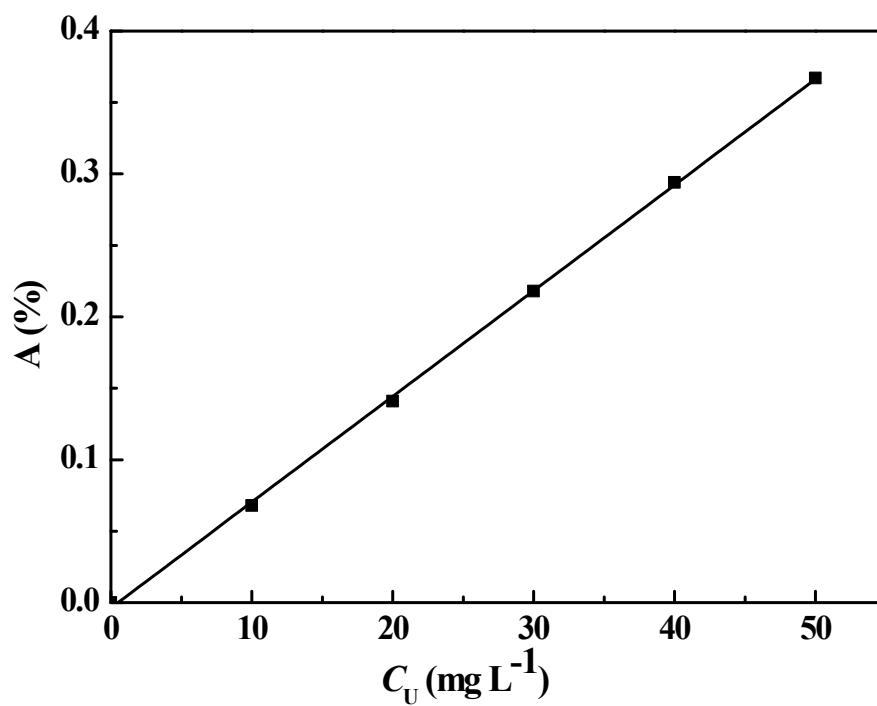

**Fig. S1** The calibration curve

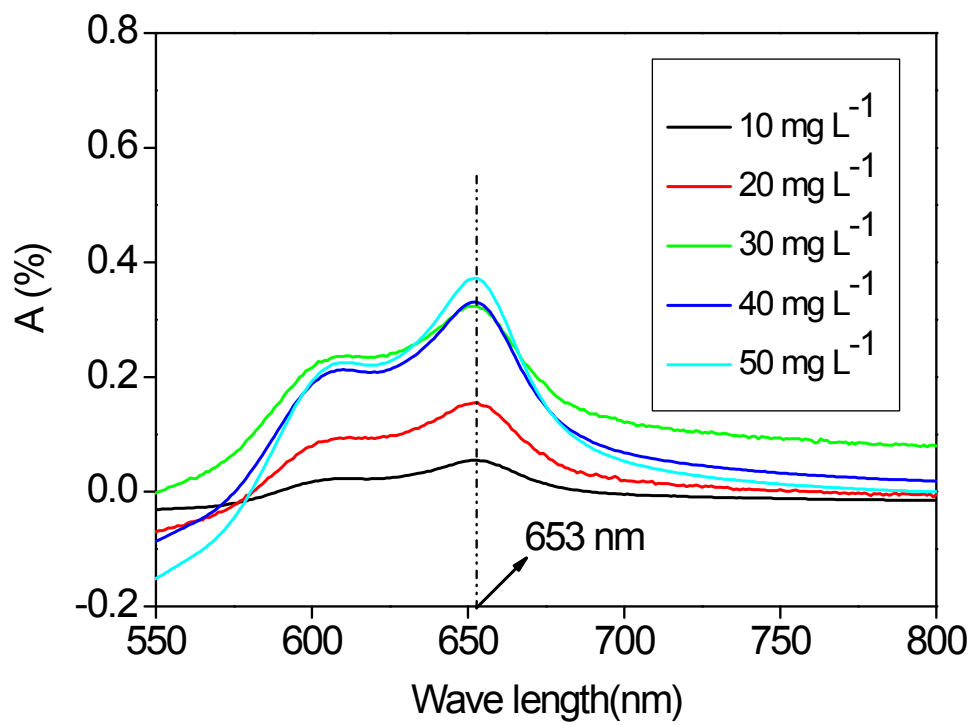

**Fig. S2** UV-Vis spectra for standard solutions

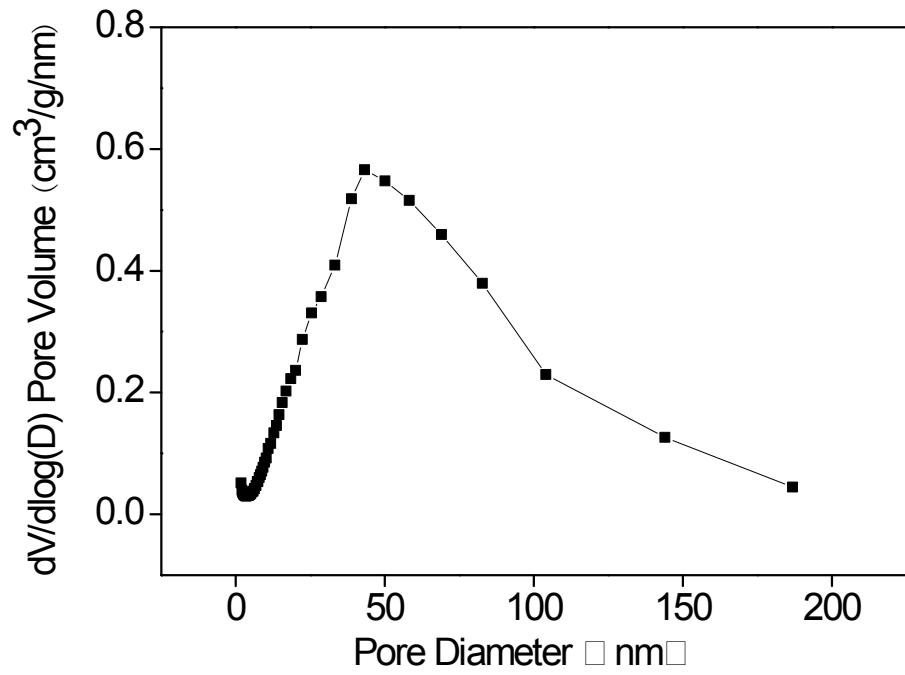

**Fig. S3** Pore size distribution of POP-EDVP

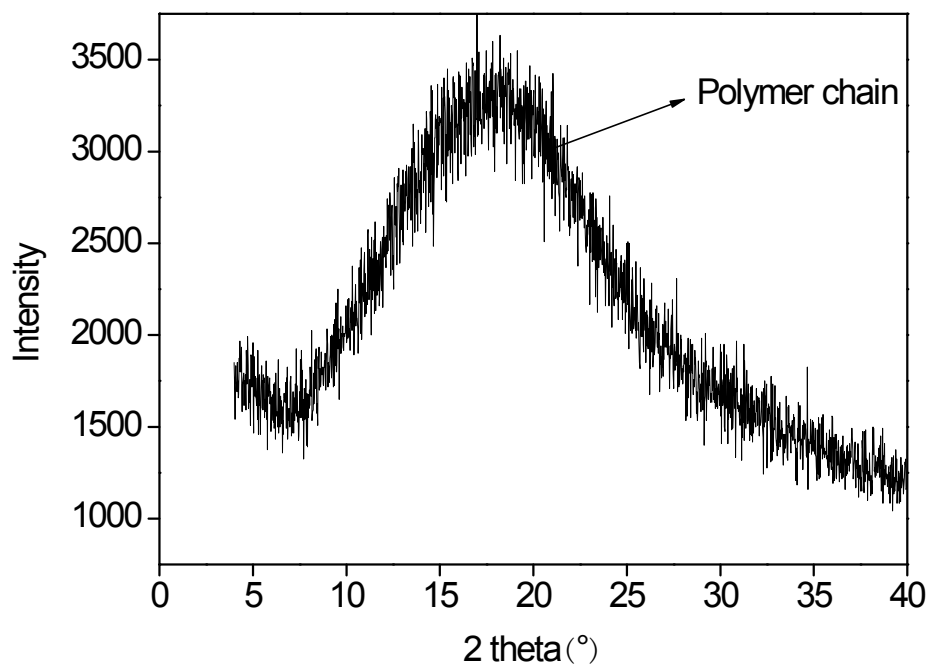

**Fig. S4** XRD pattern of POP-EDVP

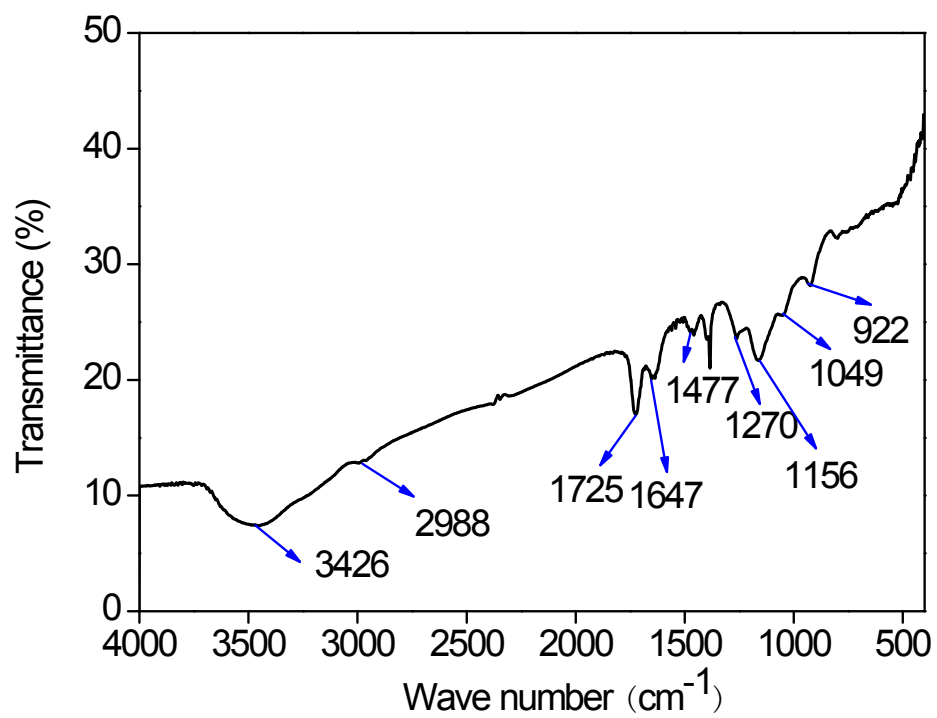

**Fig. S5** FTIR spectra of POP-EDVP



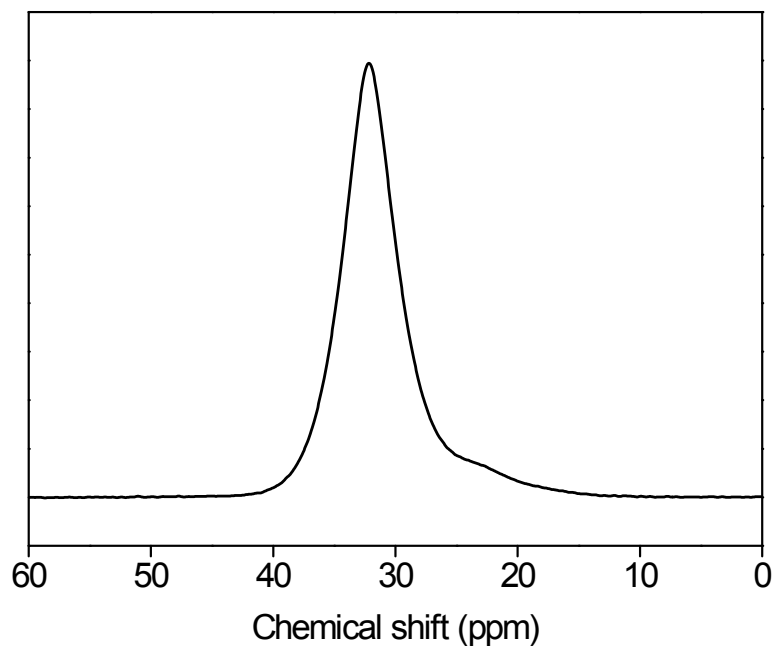

**Fig. S6**  $^{31}\text{P}$  MAS NMR spectra of POP-EDVP

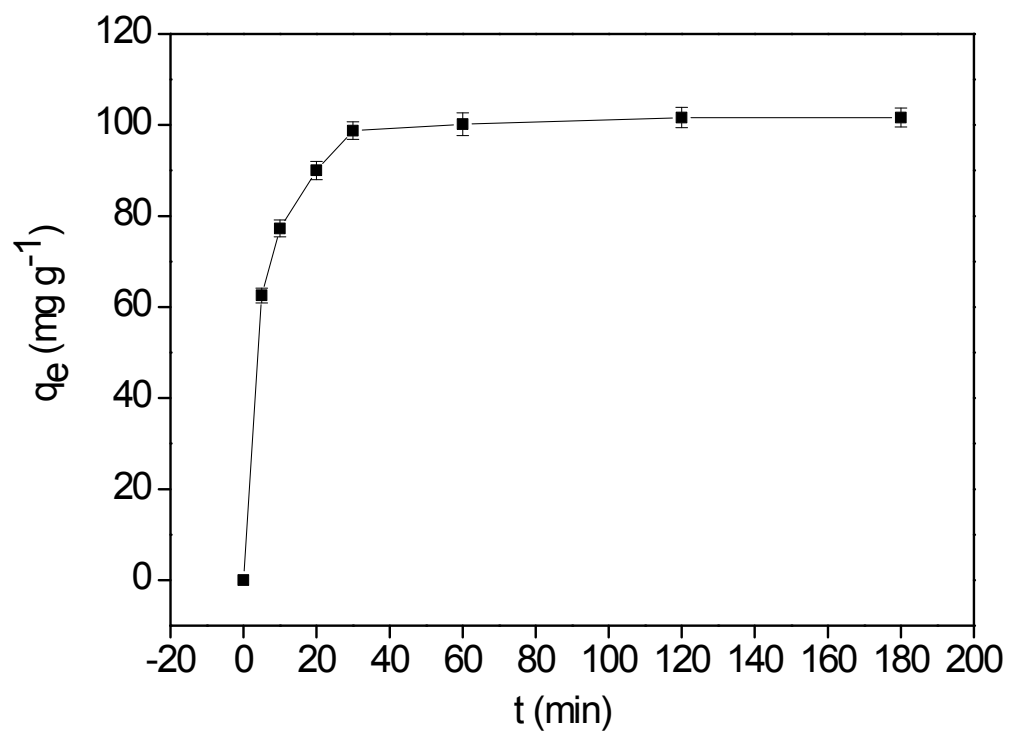

**Fig. S7** Effect of contact time for the sorption of uranium onto POP-EDVP ( $C_0=100 \text{ mg L}^{-1}$ ,  $V=25 \text{ mL}$ ,

$T=298 \text{ K}$ ,  $c(\text{H}^+) = 4 \text{ M}$ ,  $m=10\text{mg}$ )

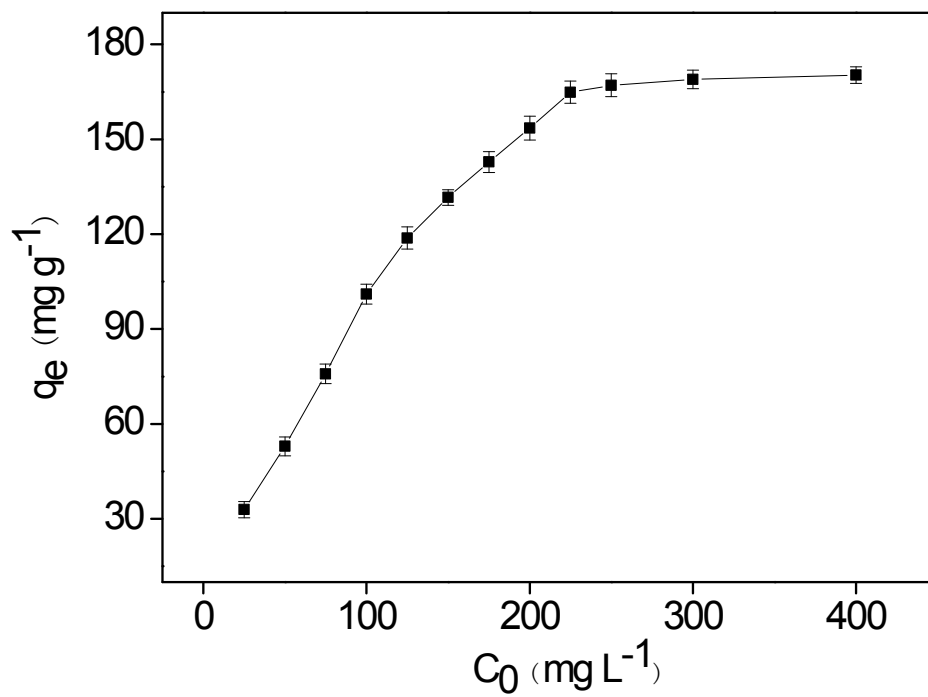

**Fig. S8** Effect of initial uranium concentration on the sorption of U(VI) onto POP-EDVP ( $t = 180$  min,  $c(\text{H}^+) = 4$  M,  $V = 25$  mL,  $T = 298$  K, and  $m = 10$  mg)

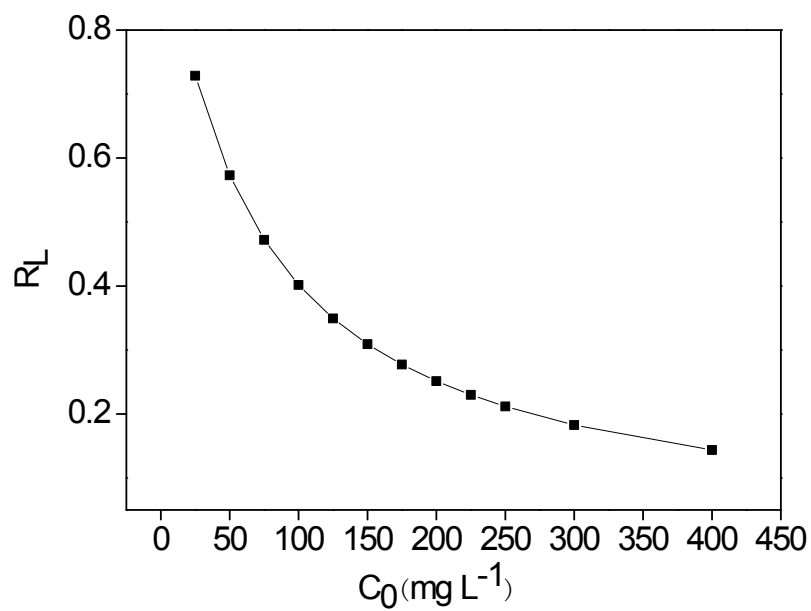

**Fig. S9** Effect of initial uranium concentration on the value of  $R_L$  ( $t = 180$  min,  $c(\text{H}^+) = 4$  M,  $V = 25$  mL,  $T = 298$  K, and  $m = 10$  mg)

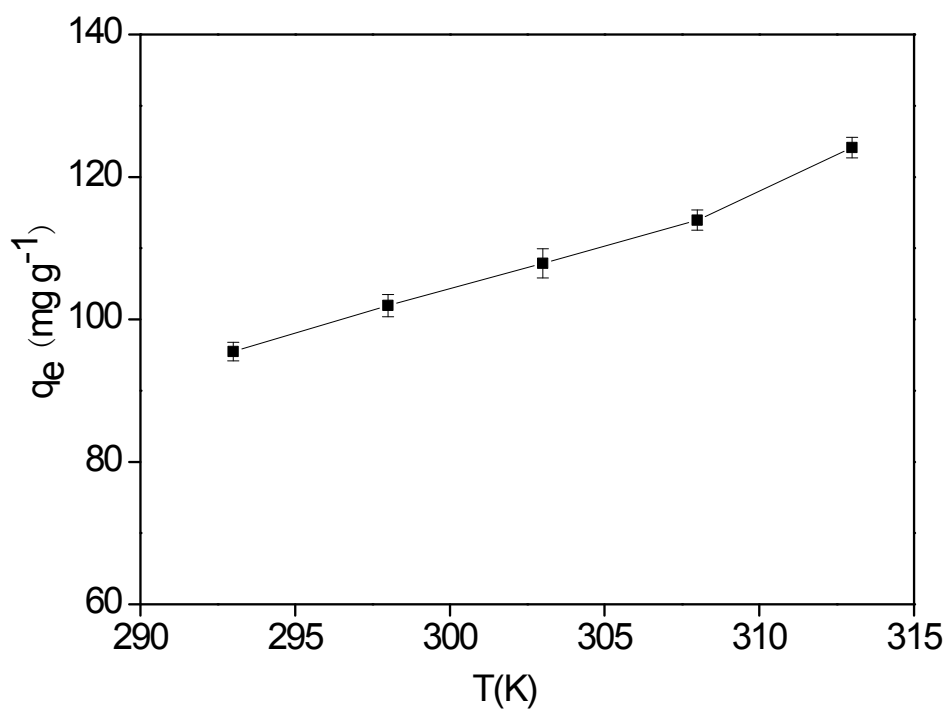

**Fig. S10** Effect of temperature on the U(VI) sorption on POP-EDVP ( $C_0 = 100 \text{ mg L}^{-1}$ ,  $c(\text{H}^+) = 4 \text{ M}$ ,  $V = 25 \text{ mL}$ ,  $t = 180 \text{ min}$ , and  $m = 10 \text{ mg}$ )

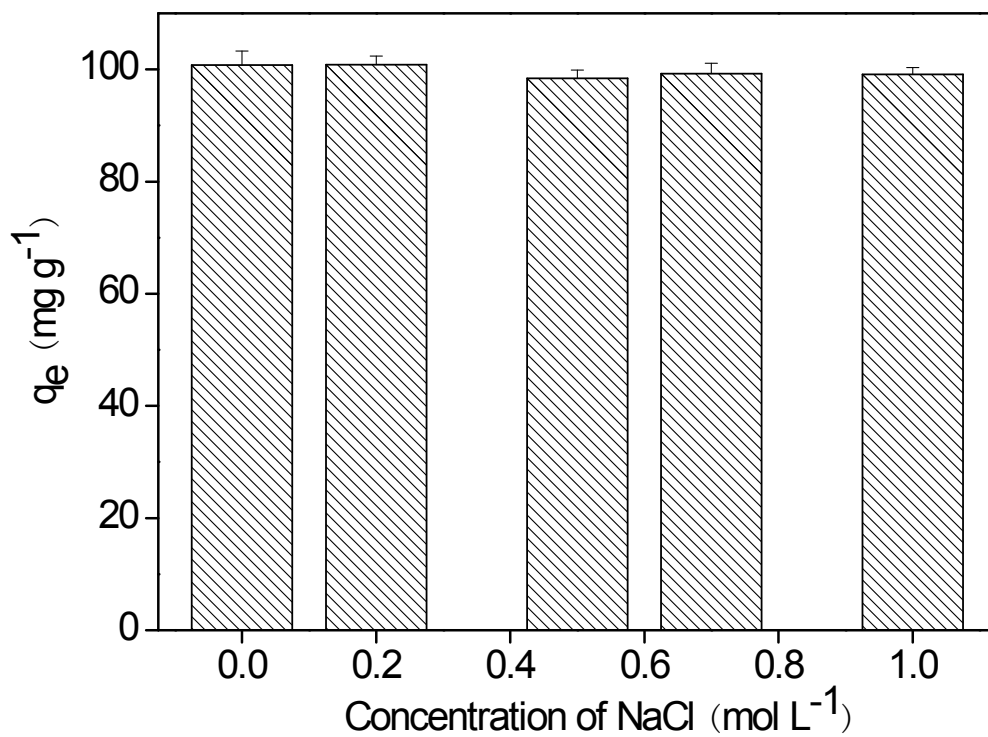

**Fig. S11** Effect of concentration of NaCl on the U(VI) sorption on POP-EDVP ( $C_0 = 100 \text{ mg L}^{-1}$ ,  $c(\text{H}^+) = 4 \text{ M}$ ,  $V = 25 \text{ mL}$ ,  $t = 180 \text{ min}$ ,  $T = 298 \text{ K}$ , and  $m = 10 \text{ mg}$ ).

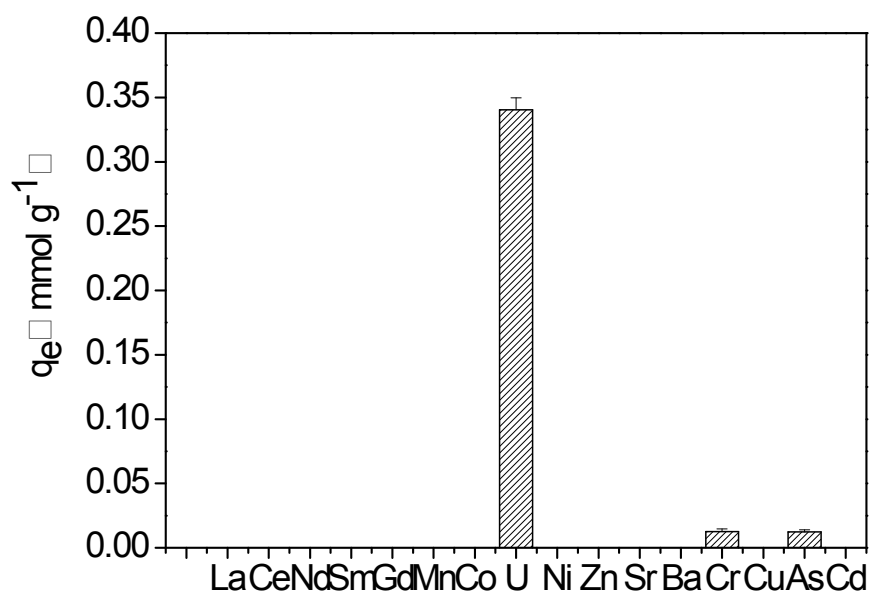

**Fig. S12** Competitive sorption capacities of coexistent ions on P4 ( $C_0=0.5$  mmol L<sup>-1</sup> for all cations,  $c$  (H<sup>+</sup>) =4 M, T=298 K, V= 25 mL, t=180 min, and m=10 mg).

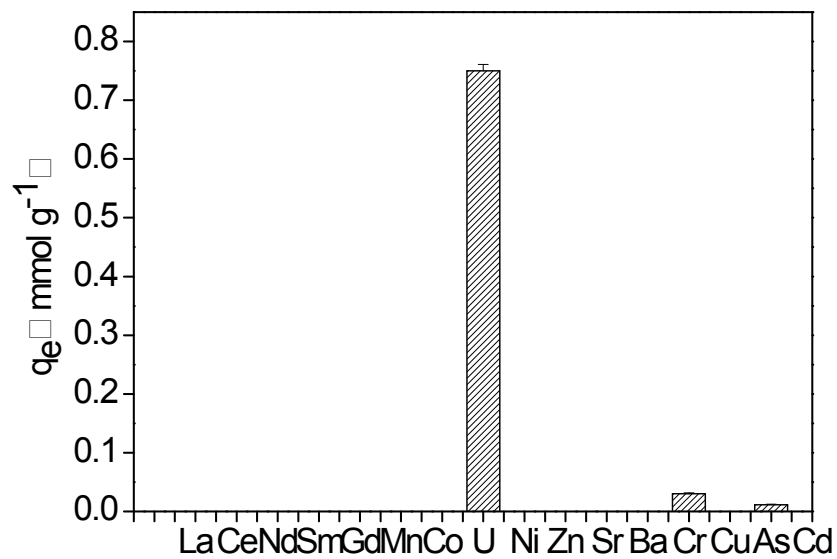

**Fig. S13** Competitive sorption capacities of coexistent ions on P5 ( $C_0=0.5 \text{ mmol L}^{-1}$  for all cations,  $c(\text{H}^+) = 4 \text{ M}$ ,  $T=298 \text{ K}$ ,  $V= 25 \text{ mL}$ ,  $t=180 \text{ min}$ , and  $m=10 \text{ mg}$ ).



**Table S1**

Kinetic parameters for uranium adsorption on POP-EDVP.

| Kinetic model           | Parameter                                          | Value    |
|-------------------------|----------------------------------------------------|----------|
| Pseudo-first-order      | $k_1$ ( $\text{min}^{-1}$ )                        | 0.03813  |
|                         | $q_{e, \text{cal}}$ ( $\text{mg g}^{-1}$ )         | 30.5126  |
|                         | $R^2$                                              | 0.8705   |
| Pseudo-second-order     | $k_2$ ( $\text{g mg}^{-1} \text{min}^{-1}$ )       | 0.00388  |
|                         | $q_{e, \text{cal}}$ ( $\text{mg g}^{-1}$ )         | 102.45   |
|                         | $R^2$                                              | 0.9999   |
| Intraparticle diffusion | $K_{int}$ ( $\text{mg g}^{-1} \text{min}^{-1/2}$ ) | 2.74619  |
|                         | $c$ ( $\text{mg g}^{-1}$ )                         | 71.26477 |
|                         | $R^2$                                              | 0.77369  |

**Table S2**

Adsorption isotherms parameters for uranium on POP-EDVP.

| Adsorbent | Kinetic model | Parameter                        | Value   |
|-----------|---------------|----------------------------------|---------|
| POP-EDVP  | Langmuir      | $b$ (L mg <sup>-1</sup> )        | 0.0149  |
|           |               | $q_{\max}$ (mg g <sup>-1</sup> ) | 215.9   |
|           |               | $R^2$                            | 0.9882  |
|           | Freundlich    | $K_F$ (mg g <sup>-1</sup> )      | 9.76515 |
|           |               | $n$                              | 1.8448  |
|           |               | $R^2$                            | 0.96556 |

**Table S3**

Thermodynamic parameters of uranium adsorption on POP-EDVP.

| $\Delta H^\circ$ (KJ mol <sup>-1</sup> ) | $\Delta S^\circ$ (J mol <sup>-1</sup> K <sup>-1</sup> ) | $\Delta G^\circ$ (KJ mol <sup>-1</sup> ) |           |           |           |           |
|------------------------------------------|---------------------------------------------------------|------------------------------------------|-----------|-----------|-----------|-----------|
|                                          |                                                         | 293 K                                    | 298 K     | 303 K     | 308 K     | 313 K     |
| 17.1684                                  | 119.58                                                  | -17.86854                                | -18.46644 | -19.06434 | -19.66224 | -20.26014 |

**Table. S4**Comparison of selectivity of POP-EDVP, P1, P2 and P3 in strong HNO<sub>3</sub> media <sup>a</sup>

| Adsorbents | S <sub>u</sub> | c (H <sup>+</sup> ) (mol/L) |
|------------|----------------|-----------------------------|
| POP-EDVP   | 94.2%          | 4                           |
| P1         | 0              | 4                           |
| P2         | 0              | 4                           |
| P3         | 0              | 4                           |

<sup>a</sup> Competitive sorption capacities of coexistent ions on adsorbents ( $C_0=0.5 \text{ mmol L}^{-1}$  for all cations,  $c(\text{H}^+)=4 \text{ M}$ ,  $T=298 \text{ K}$ ,  $V=25 \text{ mL}$ ,  $t=180 \text{ min}$ , and  $m=10 \text{ mg}$ ).

**Table. S5**

The porosity of POP-EDVP, P4 and P5

| Adsorbents | S <sub>BET</sub> (m <sup>2</sup> /g) | Pore Size (nm) | V (ml/g)     |
|------------|--------------------------------------|----------------|--------------|
| POP-EDVP   | 61.8                                 | 42.7           | 0.41         |
| P4         | 114.9                                | 27.8           | 0.64         |
| P5         | 0.02                                 | 465.2          | Not detected |

**Table. S6**Comparison of selectivity of POP-EDVP, P4 and P5 in strong HNO<sub>3</sub> media <sup>a</sup>

| Adsorbents | S <sub>u</sub> | c (H <sup>+</sup> ) (mol/L) |
|------------|----------------|-----------------------------|
| POP-EDVP   | 94.2 %         | 4                           |
| P4         | 93.2 %         | 4                           |
| P5         | 94.7 %         | 4                           |

<sup>a</sup> Competitive sorption capacities of coexistent ions on adsorbents (C<sub>0</sub>=0.5 mmol L<sup>-1</sup> for all cations, c (H<sup>+</sup>)= 4 M, T=298 K, V= 25 mL, t=180 min, and m=10 mg).

**Table S7**

Calculated interaction energy parameters (in kcal mol<sup>-1</sup>) for the complexation of UO<sub>2</sub>(NO<sub>3</sub>)<sub>2</sub> with POP-EDVP with two P=O / UO<sub>2</sub>(NO<sub>3</sub>)<sub>2</sub>.

| Ratio of P=O: UO <sub>2</sub> (NO <sub>3</sub> ) <sub>2</sub> | $\Delta E_{\text{gas}}$ |
|---------------------------------------------------------------|-------------------------|
| 1:1                                                           | -48.94                  |
| 2:1                                                           | -40.66                  |
